# Supplementary material for: Environments and lifting mechanisms of cold-frontal convective cells during the warm season in Germany
Source: Copernicus journal article supplement (doi:10.5194/wcd-6-695-2025), 2025-06-27
Supplement: Supplementary file 1 [file wcd-6-695-2025-supplement.pdf]

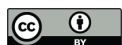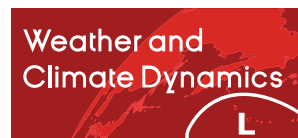

Open Access

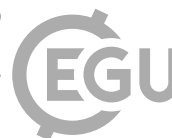

*Supplement of*

## **Environments and lifting mechanisms of cold-frontal convective cells during the warm season in Germany**

**George Pacey et al.**

*Correspondence to:* George Pacey ([george.pacey@unibe.ch](mailto:george.pacey@unibe.ch))

The copyright of individual parts of the supplement might differ from the article licence.

In this supplementary material, figures from the main paper are shown with the 25th and 75th percentiles of the distributions shown as horizontal lines.

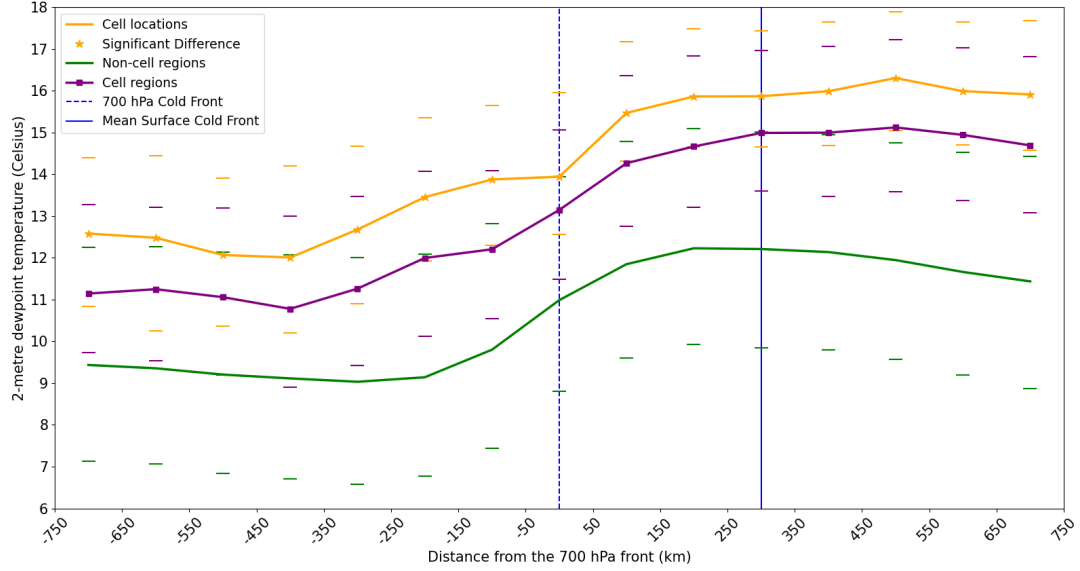

Figure S1: 2-metre dewpoint temperature (Celsius) depending on distance from the 700 hPa front (km) for cell grid points (orange), cell region grid points (purple) and non-cell region grid points (green). Stars indicate that the convective cell grid point mean is significantly different from the non-cell region grid point mean at the 95% confidence level based on a Welch's t-test, which does not assume equal population variance. **The coloured horizontal lines represent the 25th and 75th percentiles of the distributions.** The dashed vertical line and solid vertical line represent the 700 hPa front and mean surface front location, respectively.

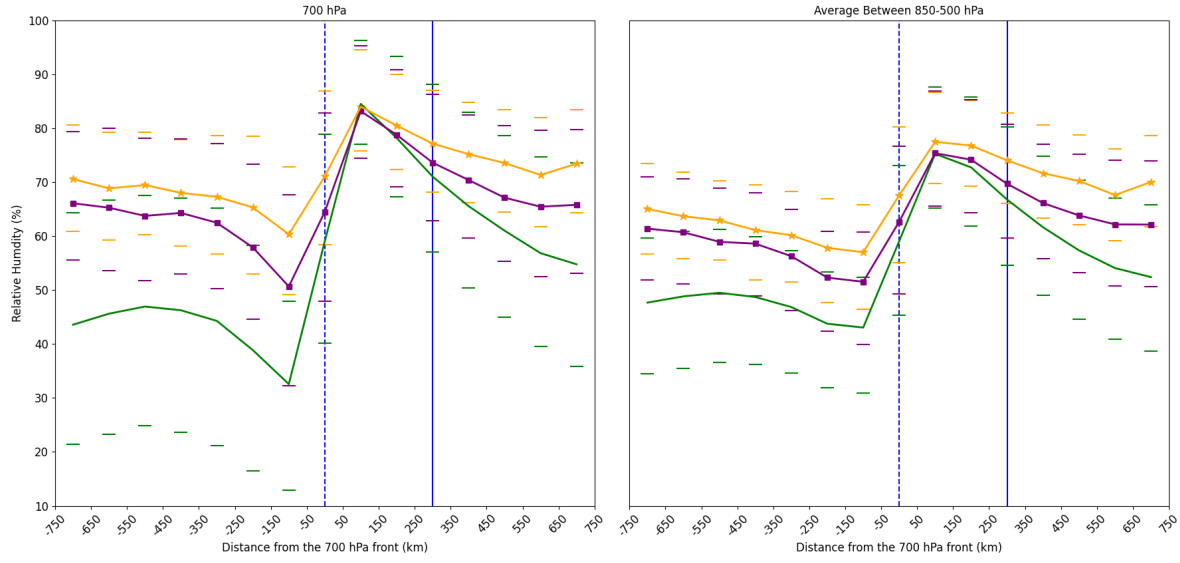

Figure S2: As Figure S1 but for relative humidity at 700 hPa (%) and mean relative humidity between 850–500 hPa.

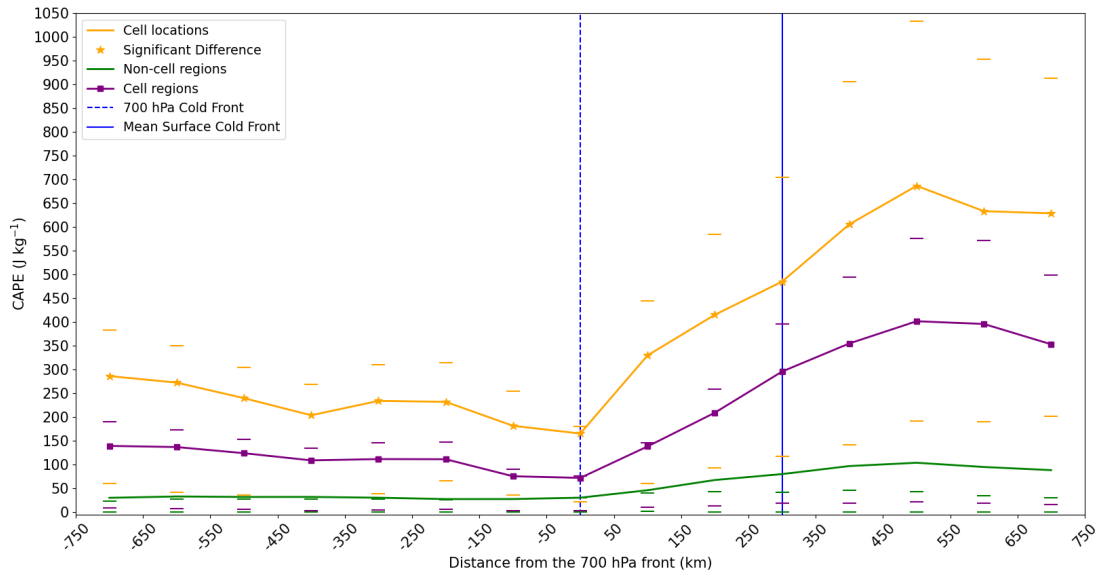

Figure S3: As Figure S1 but for CAPE. The ERA5 CAPE variable uses the parcel with the highest CAPE considering different departure levels below 350 hPa.

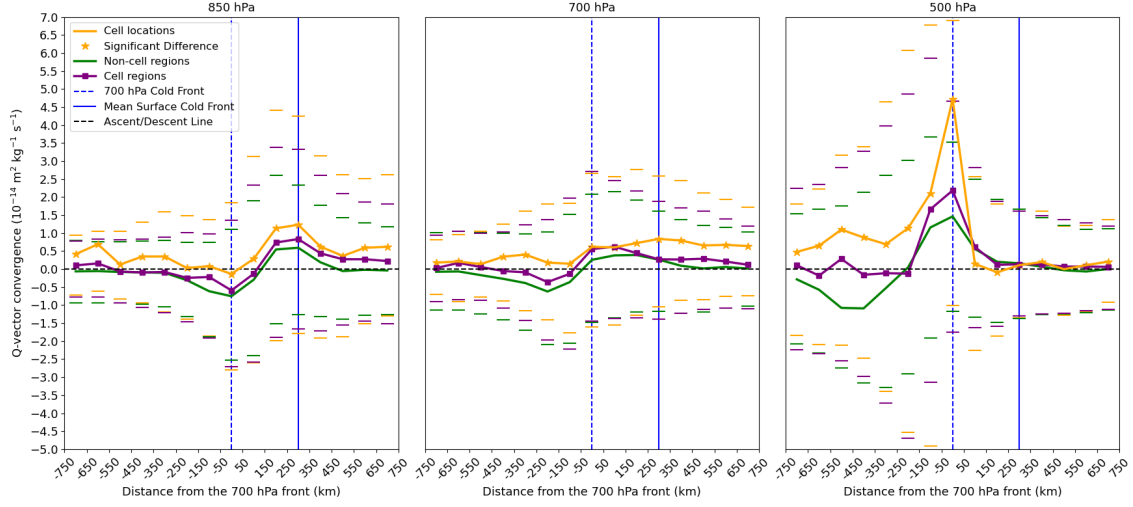

Figure S4: As Figure S1 but for Q-vector convergence at 850 hPa, 700 hPa and 500 hPa (left to right). Positive and negative values indicate convergence (ascending motion) and divergence (descending motion) of the Q-vector, respectively.

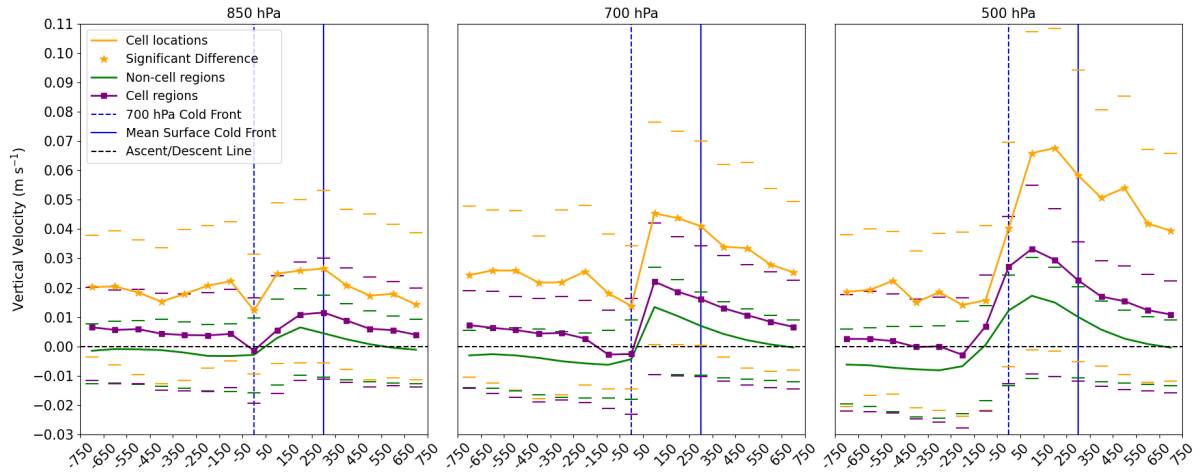

Figure S5: As Figure S1 but for vertical velocity at 850, 700 and 500 hPa. Positive and negative values indicate ascending and descending motion respectively.

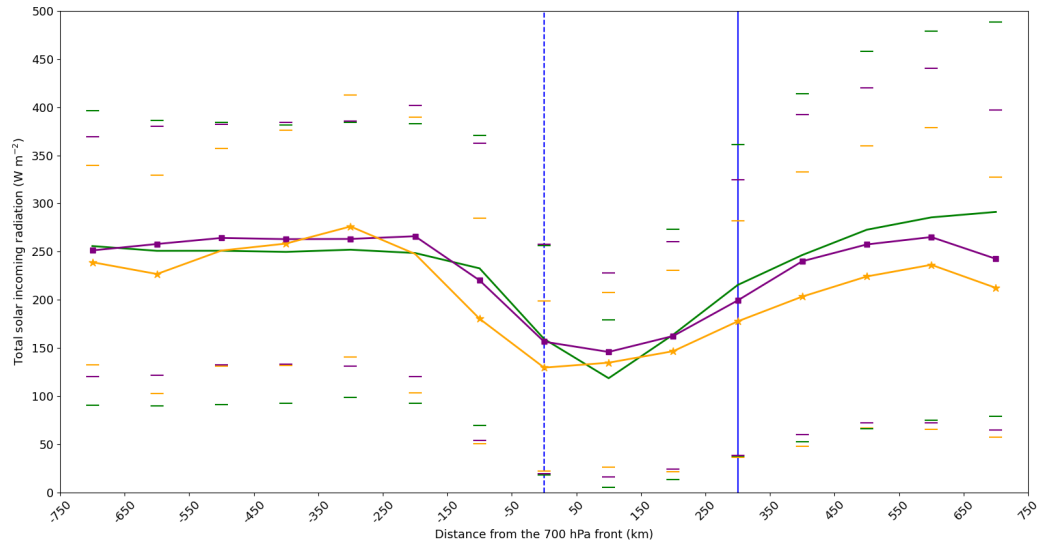

Figure S6: As Figure S1 but for total incoming solar radiation ( $\text{W m}^{-2}$ ) only using timesteps between 09–18 UTC.

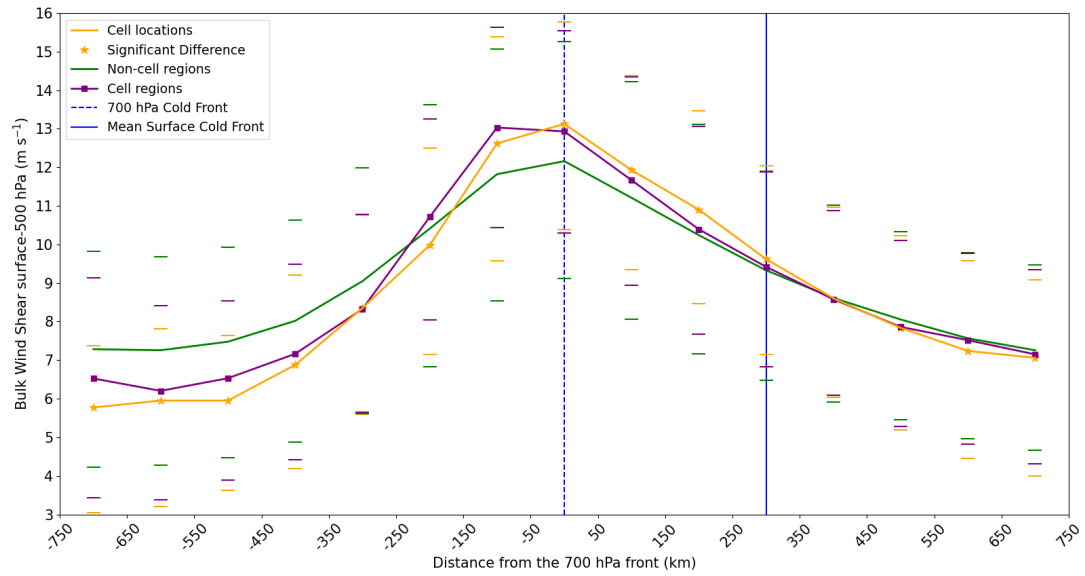

Figure S7: As Figure S1 but for wind shear between the surface and 500 hPa.

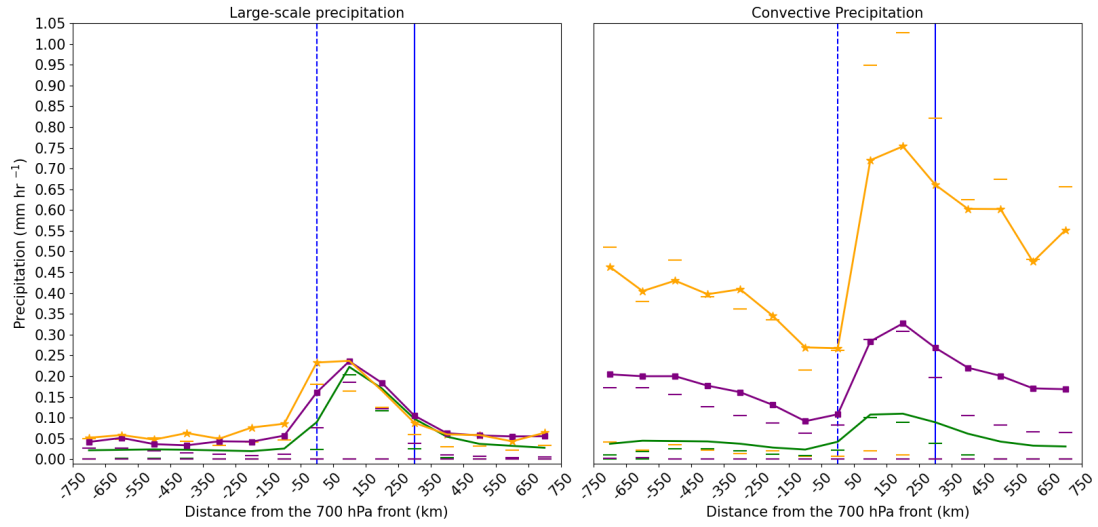

Figure S8: As Figure S1 but for large-scale precipitation and convective precipitation.

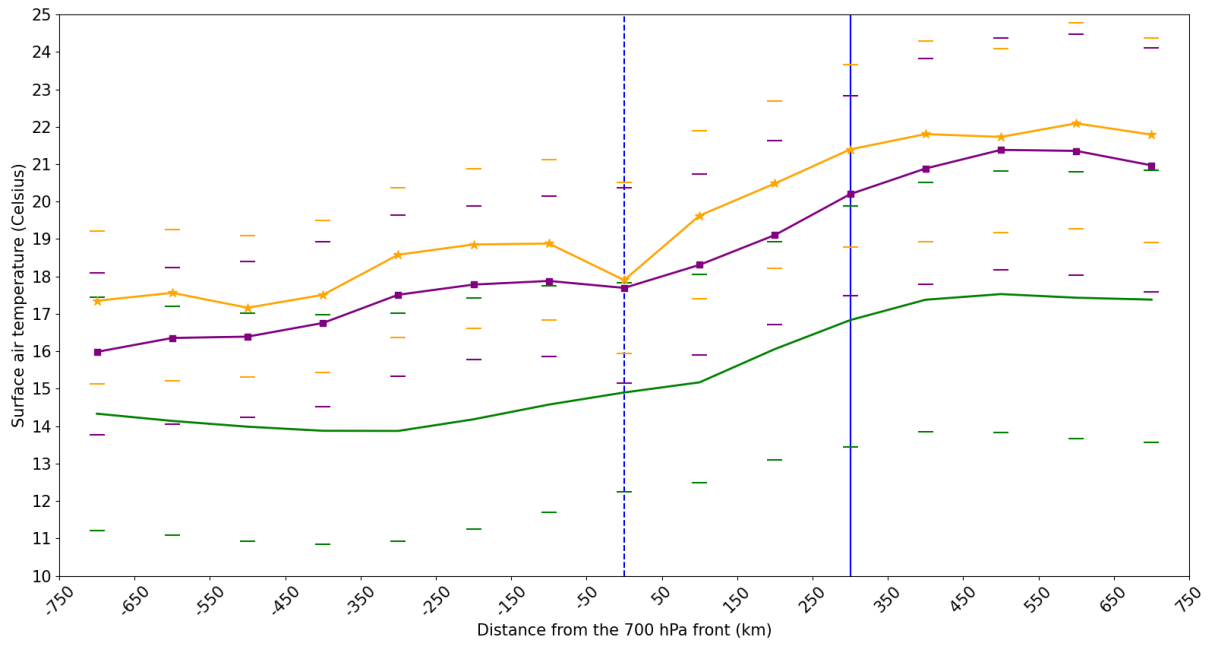

Figure S9: As Figure S1 but for surface air temperature.

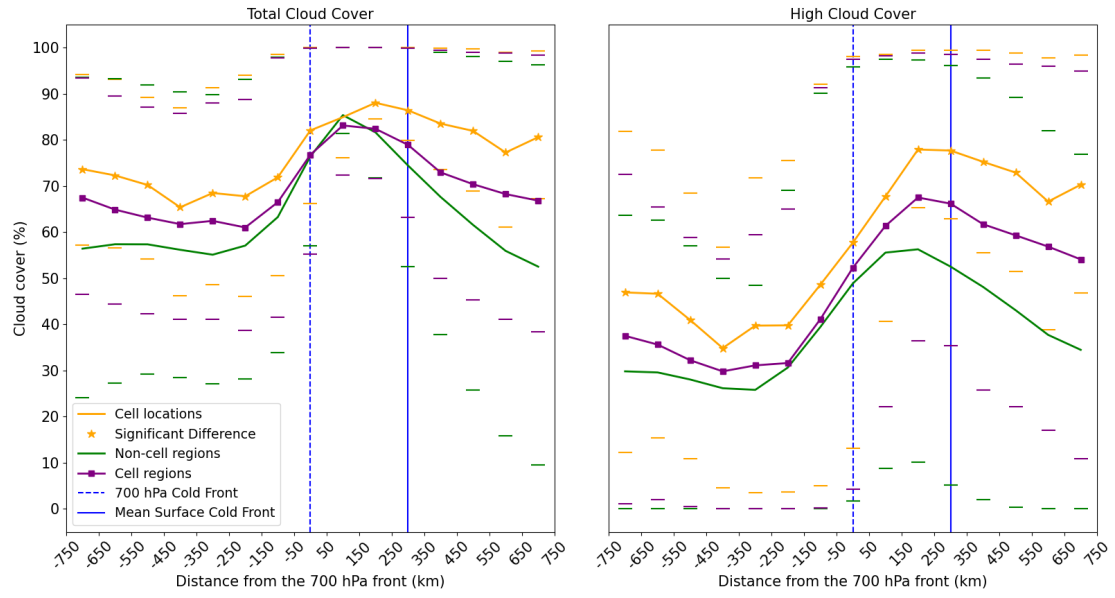

Figure S10: As Figure S1 but total cloud cover (left) and high-cloud cover (right).
